# Supplementary material for: Analysis of the interfacial characteristics of BiVO4/metal oxide heterostructures and its implication on their junction properties
Source: Royal Society of Chemistry journal article supplement (doi:10.1039/c8cp07483f), 2019-01-01
Supplement: c8cp07483f1.pdf [file c8cp07483f1.pdf]

## Supporting Information

### **Analysis of the interfacial characteristics of BiVO<sub>4</sub>/metal oxide heterostructures and its implication on their junction properties**

Yannick Hermans<sup>ab</sup>, Sebastián Murcia-López<sup>c</sup>, Andreas Klein<sup>a</sup>, Roel van de Krol<sup>d</sup>, Teresa Andreu<sup>c</sup>, Joan Ramón Morante<sup>c</sup>, Thierry Toupance<sup>b</sup> and Wolfram Jaegermann<sup>a</sup>

<sup>a</sup> *Institute of Material Science, Technische Universität Darmstadt, Petersenstr. 23, 64287 Darmstadt, Germany.*

<sup>b</sup> *Université de Bordeaux, Institut des Sciences Moléculaires, ISM UMR 5255 CNRS, 351 Cours de la Libération, F-33405 Talence Cédex, France.*

<sup>c</sup> *Department of Advanced Materials for Energy, Catalonia Institute for Energy Research (IREC), Jardins de les Dones de Negre, 1, 08930 Sant Adrià de Besòs, Catalonia, Spain.*

<sup>d</sup> *Institute for Solar Fuels, Helmholtz-Zentrum Berlin für Materialien und Energie GmbH, Hahn-Meitner-Platz 1, Berlin 14109, Germany .*

## Supplementary methods

### Overlayer sputter conditions

Please find the exact experimental conditions of the sputtered NiO, CoO<sub>x</sub> and ITO thin films in Table S1.

Table S1: Magnetron sputtering deposition parameters for NiO, CoO<sub>x</sub> and ITO thin films

|                              | NiO     | CoO <sub>x</sub> | ITO     |
|------------------------------|---------|------------------|---------|
| T <sub>sub</sub> (°C)        | rt      | rt               | 400     |
| Pr (Pa)                      | 0.5     | 0.5              | 0.5     |
| O <sub>2</sub> /Ar ratio (%) | 20      | 10               | 0       |
| P (W)                        | 40 (DC) | 40 (RF)          | 25 (RF) |
| Flux (sccm)                  | 20      | 20               | 6.6     |
| d (cm)                       | 8       | 8.5              | 9.6     |
| R (nm min <sup>-1</sup> )    | 3       | 1.3              | 5       |

In above table T<sub>sub</sub> is substrate temperature, rt is room temperature, Pr stands for pressure, P is the power applied to the sputter target, d stands for the target-to-substrate distance and R for the deposition rate of the film.

### Overlayer thickness calculation

The thickness of the deposited films was estimated from the difference in attenuation of the Bi4f and V2p<sub>3/2</sub> core level emission. Since the kinetic energy of the photoelectrons from the Bi4f emission is higher than for the V2p<sub>3/2</sub> emission the Bi4f photoelectrons are attenuated less because of the higher inelastic mean free path of these photoelectrons. The thickness of a thin film growing on top of the BiVO<sub>4</sub> substrate can then be evaluated, under the assumption that the surface V/Bi ratio does not change during film growth, according to following formula:

$$t = \frac{\ln\left(\frac{I_V \times I_{Bi0}}{I_{Bi} \times I_{V0}}\right) \times \lambda_V \times \lambda_{Bi}}{\lambda_V - \lambda_{Bi}}$$

where t: film thickness; I<sub>V</sub>: integrated V2p<sub>3/2</sub> core level intensity at film thickness t; I<sub>Bi</sub>: integrated Bi4f core level intensity at film thickness t; I<sub>V0</sub>: integrated V2p<sub>3/2</sub> core level intensity at zero film thickness; I<sub>Bi0</sub>: integrated Bi4f core level intensity at zero film thickness; λ<sub>V</sub>: electron effective attenuation length of V2p<sub>3/2</sub> photoelectrons; λ<sub>Bi</sub>: electron effective attenuation length of Bi4f photoelectrons

The electron effective attenuation lengths were calculated using the “NIST Electron Effective-Attenuation-Length Database”, based on the density, number of valence electrons and band gap of the deposited film.

## Supplementary figure

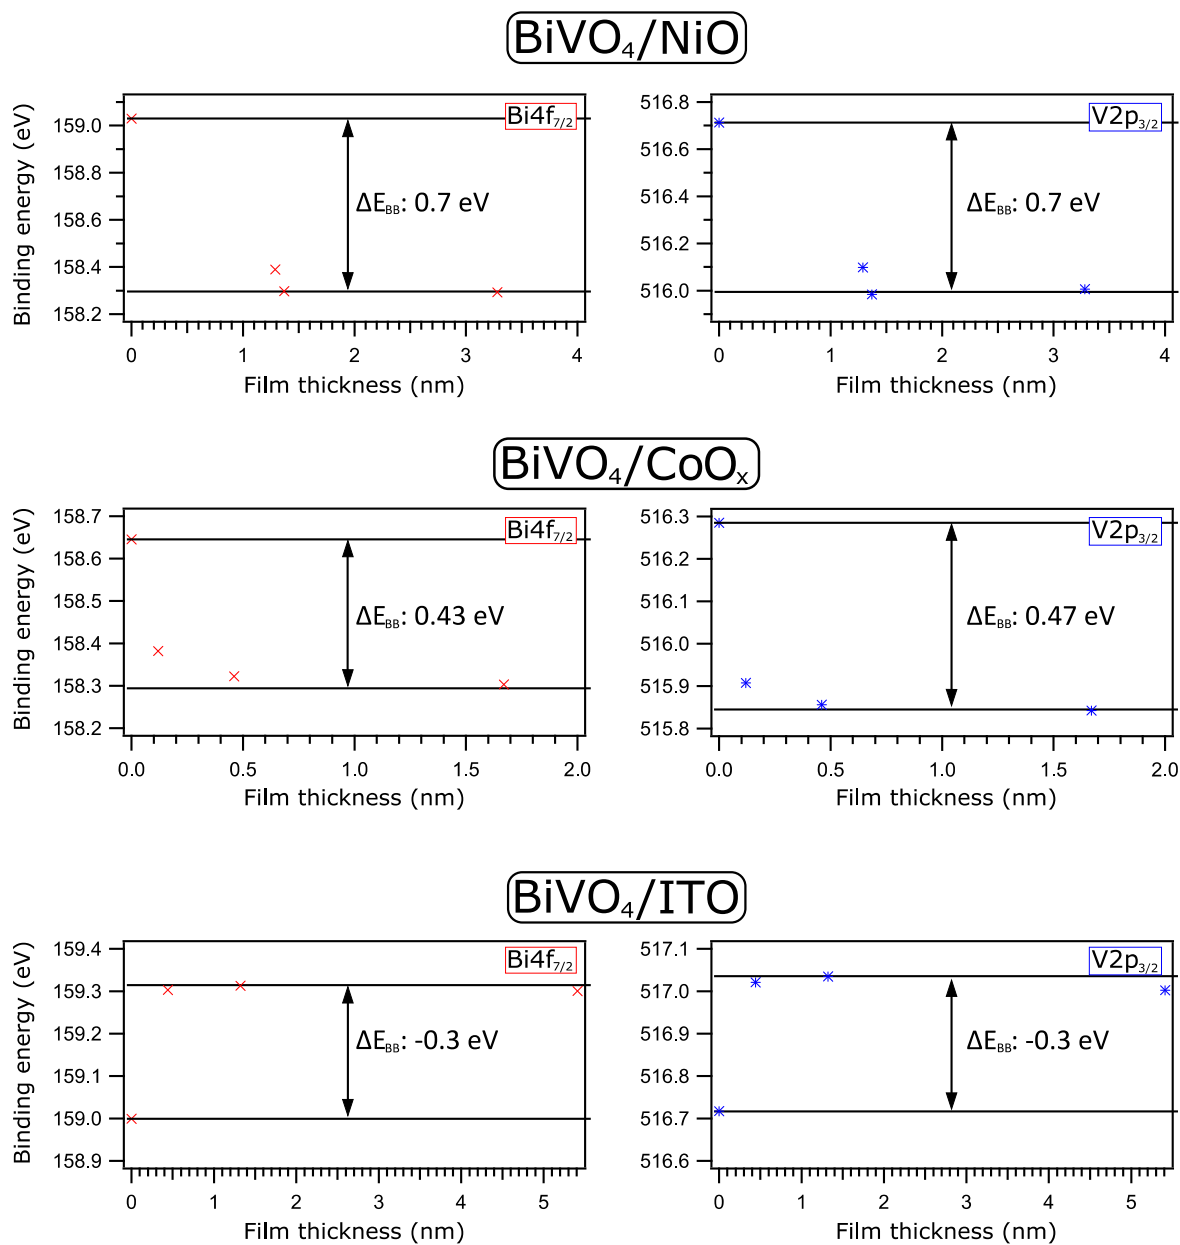

**Figure S1:** Evolution of Bi4f<sub>7/2</sub> and V2p<sub>3/2</sub> core level binding energy with respect to overlayer thickness for the BiVO<sub>4</sub>/NiO, BiVO<sub>4</sub>/CoO<sub>x</sub> and BiVO<sub>4</sub>/ITO interface experiments. Total band bending (ΔE<sub>BB</sub>) values are denoted in the graphs.
